# Supplementary material for: The Imbalance of p53–Park7 Signaling Axis Induces Iron Homeostasis Dysfunction in Doxorubicin‐Challenged Cardiomyocytes
Source: PubMed Central journal article supplement (PMC10214246; doi:10.1002/advs.202206007), 2023-03-26
Supplement: ADVS-10-2206007-s001.pdf [file ADVS-10-2206007-s001.pdf]

## Supporting Information

for *Adv. Sci.*, DOI 10.1002/adv.202206007

The Imbalance of p53–Park7 Signaling Axis Induces Iron Homeostasis Dysfunction in Doxorubicin-Challenged Cardiomyocytes

*Jianan Pan, Weiyao Xiong, Alian Zhang, Hui Zhang, Hao Lin, Lin Gao, Jiahan Ke, Shuying Huang, Junfeng Zhang, Jun Gu\*, Alex Chia Yu Chang\* and Changqian Wang\**

## Supporting Information

### The Imbalance of p53-Park7 Signaling Axis Induces Iron Homeostasis Dysfunction in

### Doxorubicin-Challenged Cardiomyocytes

**Table S1 Sequences of gene-shRNA**

| shRNA     | Sequence              |
|-----------|-----------------------|
| shPark7-1 | GCAGTGTAGCCGTGATGTAAT |
| shPark7-2 | GAAATCTGGGTGCACAGAATT |
| shPark7-3 | GCTCTGTTGGCTCACGAAGTA |
| Scramble  | UUCUCCGAACGUGUCACGUTT |

**Table S2 Antibodies.**

| Antibodies | Cat. No. and Company                | Dilution Ratio                                        |
|------------|-------------------------------------|-------------------------------------------------------|
| cTnT       | ab8295, Abcam                       | 1:200 for IF                                          |
| TfR        | ab214039, Abcam                     | 1:1000 for WB                                         |
| FPN        | 26601-1-AP, Proteintech             | 1:1000 for WB                                         |
| FTH        | sc-376594, Santa Cruz Biotechnology | 1:500 for WB                                          |
| IRP1       | sc-166022, Santa Cruz Biotechnology | 1:500 for WB                                          |
| IRP2       | 23829-1-AP, Proteintech             | 1:1000 for WB                                         |
| MFRN       | 26469-1-AP, Proteintech             | 1:1000 for WB                                         |
| Park7      | 5933, Cell Signaling Technology     | 1:1000 for WB; 1:100 for IF;<br>1µg/mg protein for IP |
| p53        | 2524, Cell Signaling Technology     | 1:1000 for WB;<br>1µg/mg protein for IP               |

|                                                                                              |                                 |                       |
|----------------------------------------------------------------------------------------------|---------------------------------|-----------------------|
| p53                                                                                          | 10442-1-AP, Proteintech         | 1:1000 for WB         |
| GAPDH                                                                                        | 60004-1-Ig, Proteintech         | 1:10000 for WB        |
| HSP60                                                                                        | 15282-1-AP, Proteintech         | 1:10000 for WB        |
| Normal Rabbit<br>IgG                                                                         | 2729, Cell Signaling Technology | 1µg/mg protein for IP |
| Normal Mouse<br>IgG                                                                          | B900620, Proteintech            | 1µg/mg protein for IP |
| Anti-mouse IgG<br>(H+L)<br>(DyLight™ 800<br>4X PEG<br>Conjugate)                             | 5257, Cell Signaling Technology | 1:30000 for WB        |
| Anti-rabbit IgG<br>(H+L)<br>(DyLight™ 800<br>4X PEG<br>Conjugate)                            | 5151, Cell Signaling Technology | 1:30000 for WB        |
| Anti-rabbit IgG<br>(H+L), F(ab') <sub>2</sub><br>Fragment<br>(Alexa Fluor®<br>594 Conjugate) | 8889, Cell Signaling Technology | 1:1000 for IF         |

|                                                                                             |                                 |               |
|---------------------------------------------------------------------------------------------|---------------------------------|---------------|
| Anti-mouse IgG<br>(H+L), F(ab') <sub>2</sub><br>Fragment<br>(Alexa Fluor®<br>488 Conjugate) | 4408, Cell Signaling Technology | 1:1000 for IF |
| Anti-mouse IgG<br>(H+L), F(ab') <sub>2</sub><br>Fragment<br>(Alexa Fluor®<br>594 Conjugate) | 8890, Cell Signaling Technology | 1:1000 for IF |

**Table S3 Primers for real-time PCR.**

| <b>Primers</b>        | <b>Sequences 5'---3'</b> |
|-----------------------|--------------------------|
| Mouse <i>Ptgs2</i> Fw | CTGCGCCTTTTCAAGGATGG     |
| Mouse <i>Ptgs2</i> Re | GGGGATACACCTCTCCACCA     |
| Mouse <i>Park7</i> Fw | AGTCGCCTATGGTGAAGGAGATCC |
| Mouse <i>Park7</i> Re | TGAGCCAACAGAGCCGTAGGAC   |
| Mouse <i>p53</i> Fw   | AGTAAAGGCTCTAAAGCTCACCC  |
| Mouse <i>p53</i> Re   | CCCATCGTCAACTTGGTCCA     |
| Mouse <i>Gapdh</i> Fw | ATCATCCCTGCATCCACT       |
| Mouse <i>Gapdh</i> Re | ATCCACGACGGACACATT       |

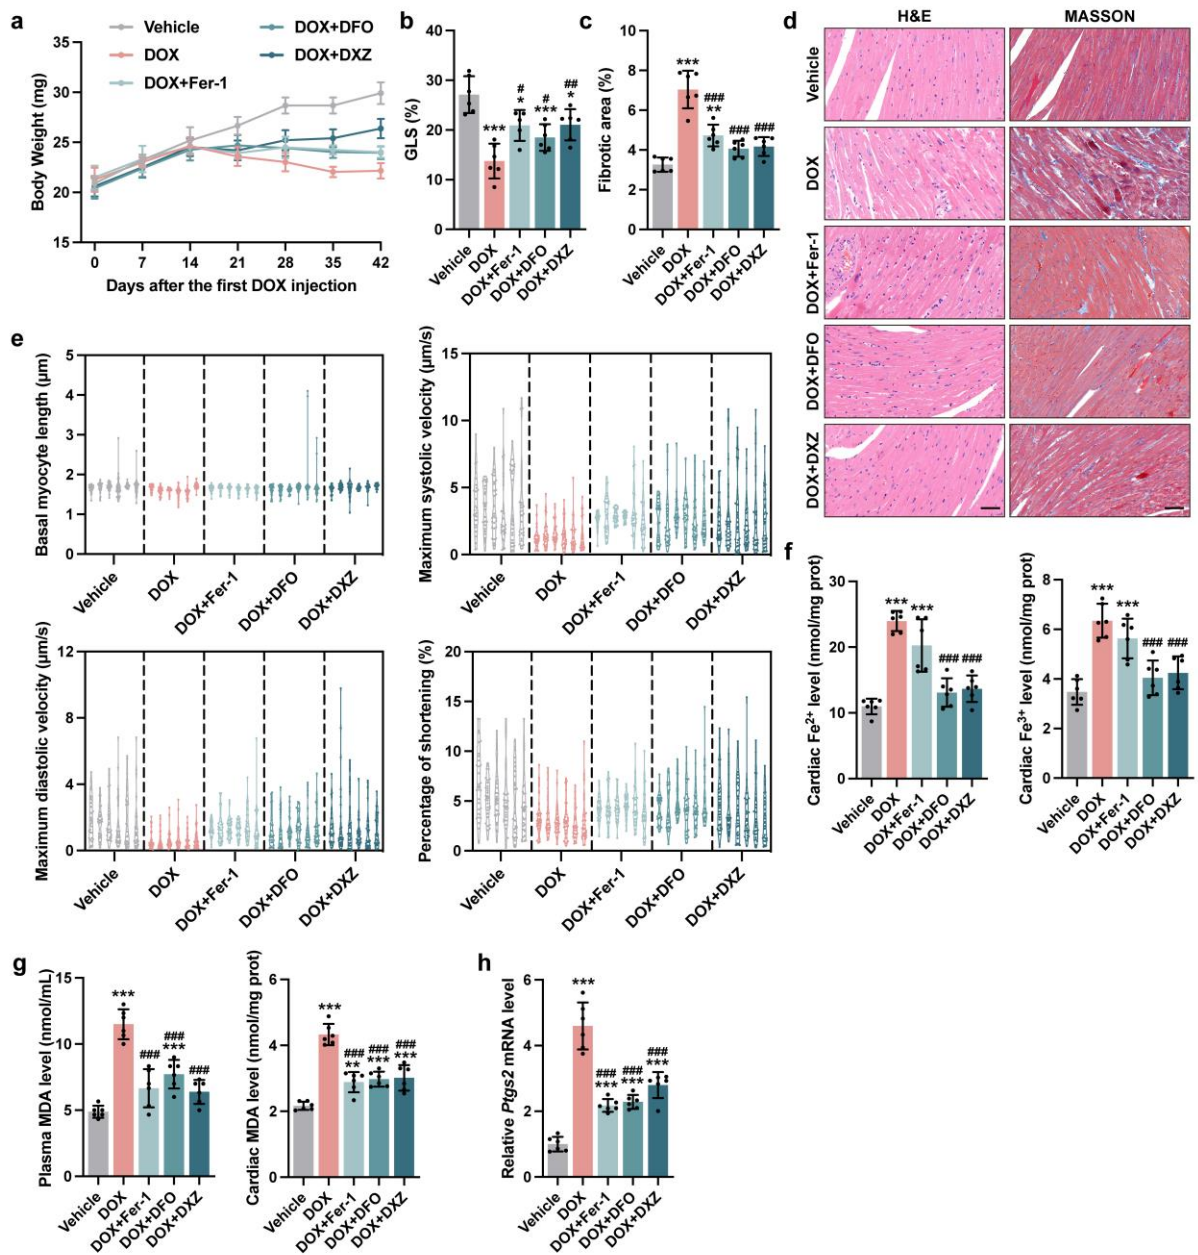

**Figure S1 Blocking myocardial ferroptosis significantly alleviates DoIC *in vivo*.**

**a**) Body weight tracing during DoIC model (n = 10). **b**) Quantification of global longitudinal strain (GLS; n=6). **c**) Percentage of fibrotic area in heart sections (n = 6). **d**) Representative micrographs of H&E and Masson's trichrome staining in heart sections (scale bars, 50  $\mu$ m). **e**) Calculation of basal myocyte length, maximum systolic velocity, maximum diastolic velocity and percentage of shortening of AMCMs of each mouse (n = 30 AMCMs per mouse). **f**) Fe<sup>2+</sup>

and  $\text{Fe}^{3+}$  levels in heart tissues (n = 6). **g**) MDA level in plasma and heart tissues (n = 6). **h**) *Ptgs2* mRNA expression in AMCMs (n = 6). The data are expressed as mean  $\pm$  SD and analyzed using one-way ANOVA followed by Tukey's post hoc test, \*p < 0.05, \*\*p < 0.01 and \*\*\*p < 0.001 vs. Vehicle group; #p < 0.05, ##p < 0.01 and ###p < 0.001 vs. DOX group.

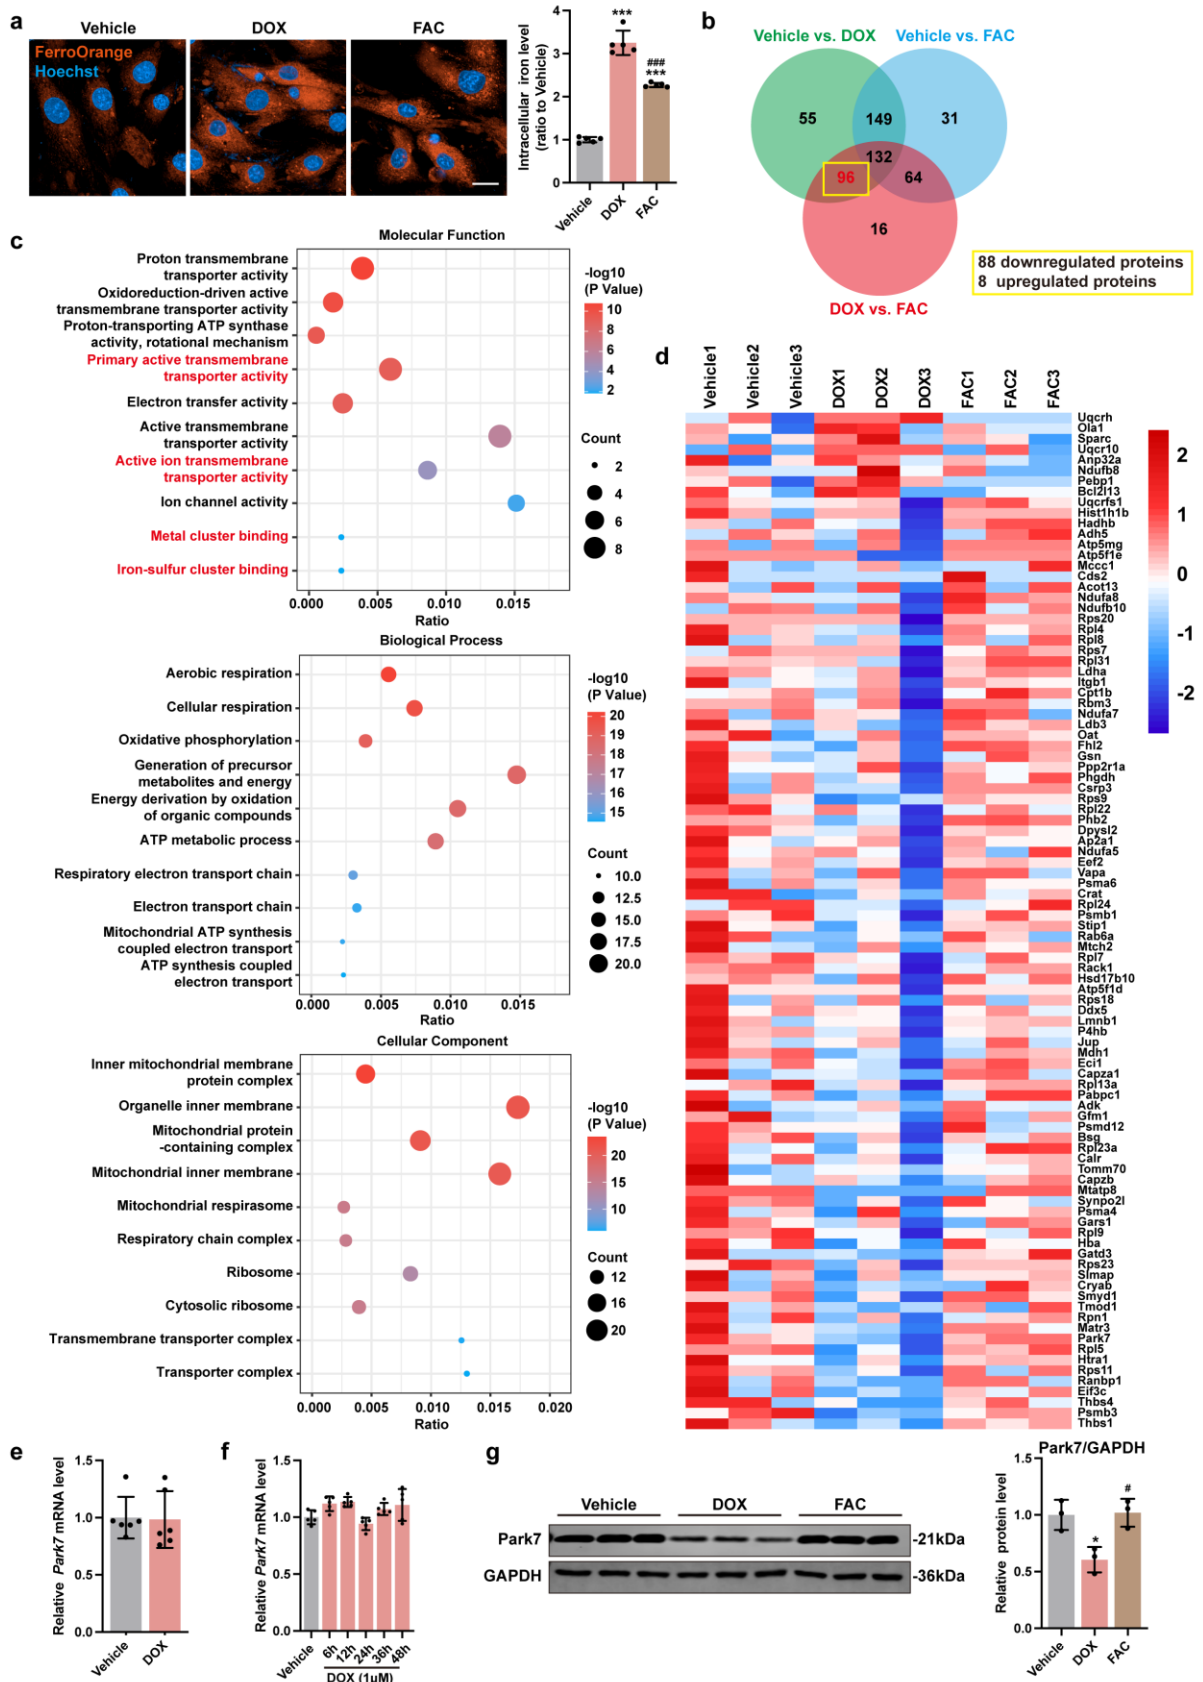

### **Park7 downregulation.**

**a)** Representative micrographs and quantitative analysis of intracellular iron level (FerroOrange staining) (scale bars, 20  $\mu\text{m}$ ;  $n = 5$ ). **b)** Venn analysis of differentially expressed proteins in NMCs (Proteins of a 1.2-fold change ( $\geq 1.2$  or  $\leq 0.83$ ) of Coverage without  $P < 0.05$  cutoff). **c)** Gene ontology analysis of differentially expressed proteins. **d)** Heatmap of DOX-dysregulated proteins. **e)** *Park7* mRNA expression in AMCs from chronic mice DoIC model ( $n = 6$ ). **f)** *Park7* mRNA expression in NMCs treated with 1  $\mu\text{M}$  DOX in different times ( $n = 5$ ). **g)** Representative immunoblots and quantitative analysis of *Park7* in NMCs treated with DOX or FAC ( $n = 3$ ). The data are expressed as mean  $\pm$  SD and analyzed using Student's t-test and one-way ANOVA followed by Tukey's post hoc test, \*\*\* $p < 0.001$  vs. Vehicle group; ### $p < 0.001$  vs. DOX group.



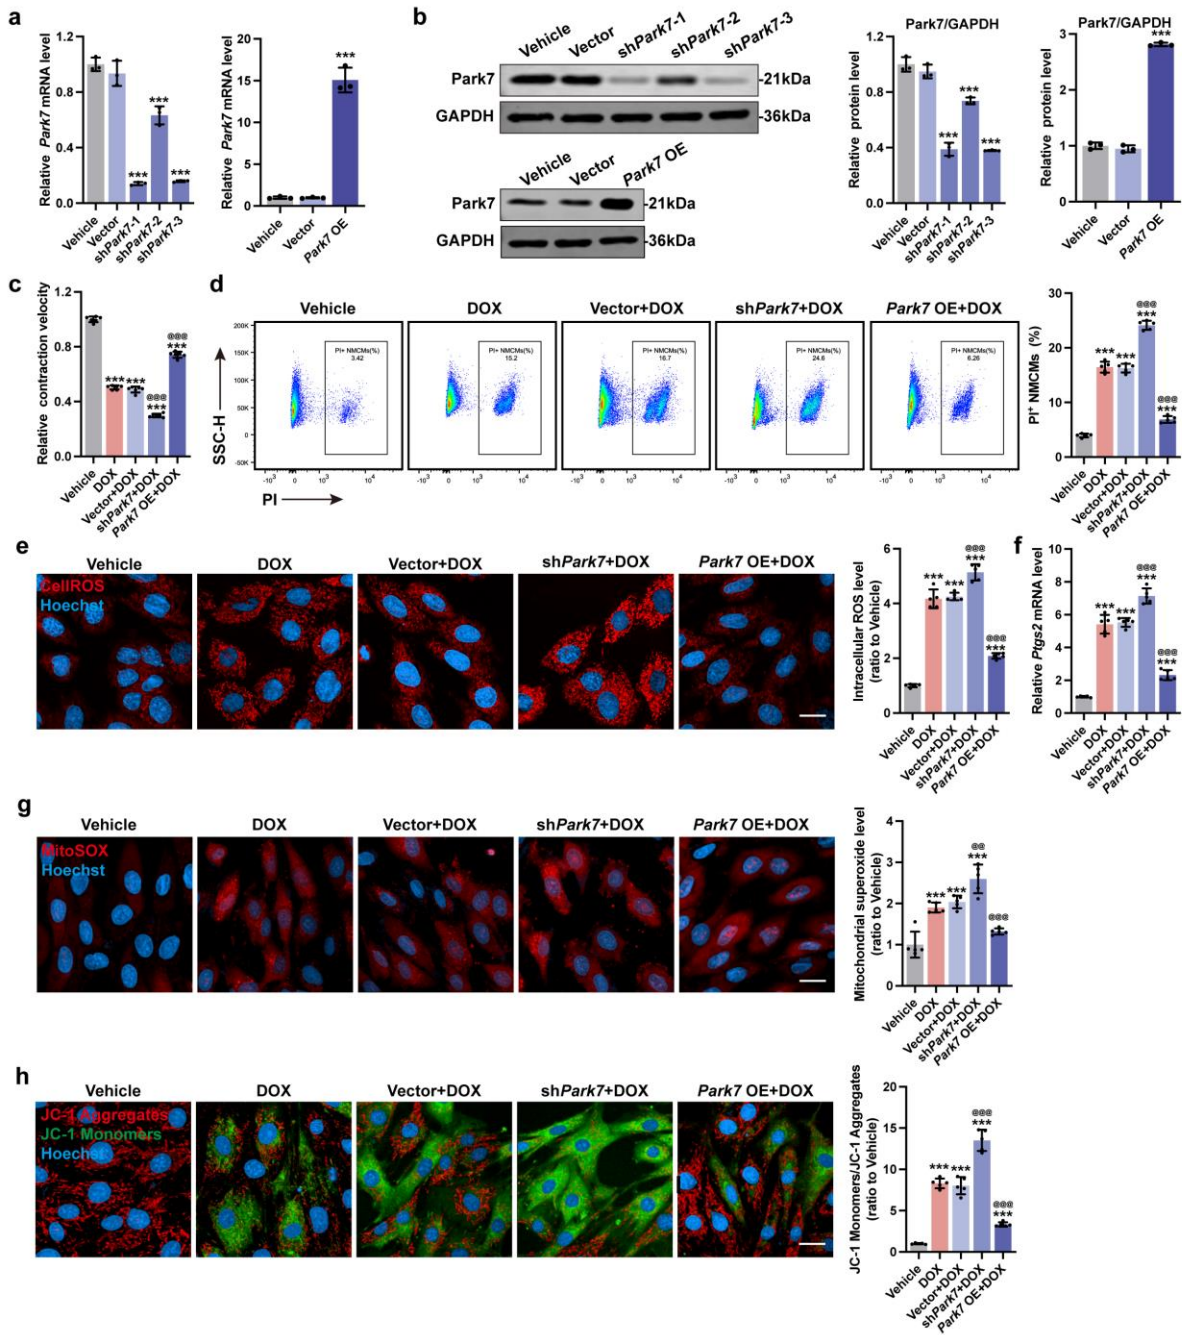

**Figure S3 DOX-induced downregulation of Park7 results in loss of iron clearance and promotes mitochondrial iron overload in cardiomyocytes.**

**a)** The infection efficiencies for downregulation or overexpression of *Park7* in NCMCs in mRNA level (n = 5). **b)** The infection efficiencies for downregulation or overexpression of *Park7* in NCMCs in protein level (n = 3). **c)** Contractile velocity of NCMCs extrapolated from live cell imaging (n = 6). **d)** The percentage of PI<sup>+</sup> NCMCs were calculated using flow

cytometry (n = 5). **e**) Representative micrographs and quantification of intracellular ROS (CellROStaining) in NMCs (scale bars, 20µm; n = 5). **f**) *Ptgs2* mRNA expression level in NMCs (n = 5). **g**) Representative micrographs and quantification of mitochondrial superoxide level (MitoSOX staining) in NMCs (scale bars, 20µm; n=5). **h**) Representative micrographs and quantification of mitochondrial membrane potential (JC-1 staining) in NMCs (scale bars, 20µm; n = 5). The data are expressed as mean ± SD and analyzed using one-way ANOVA followed by Tukey's post hoc test, \*\*\*p < 0.001 vs. Vehicle group; @@p < 0.01 and @@@p < 0.001 vs. Vector+DOX group.

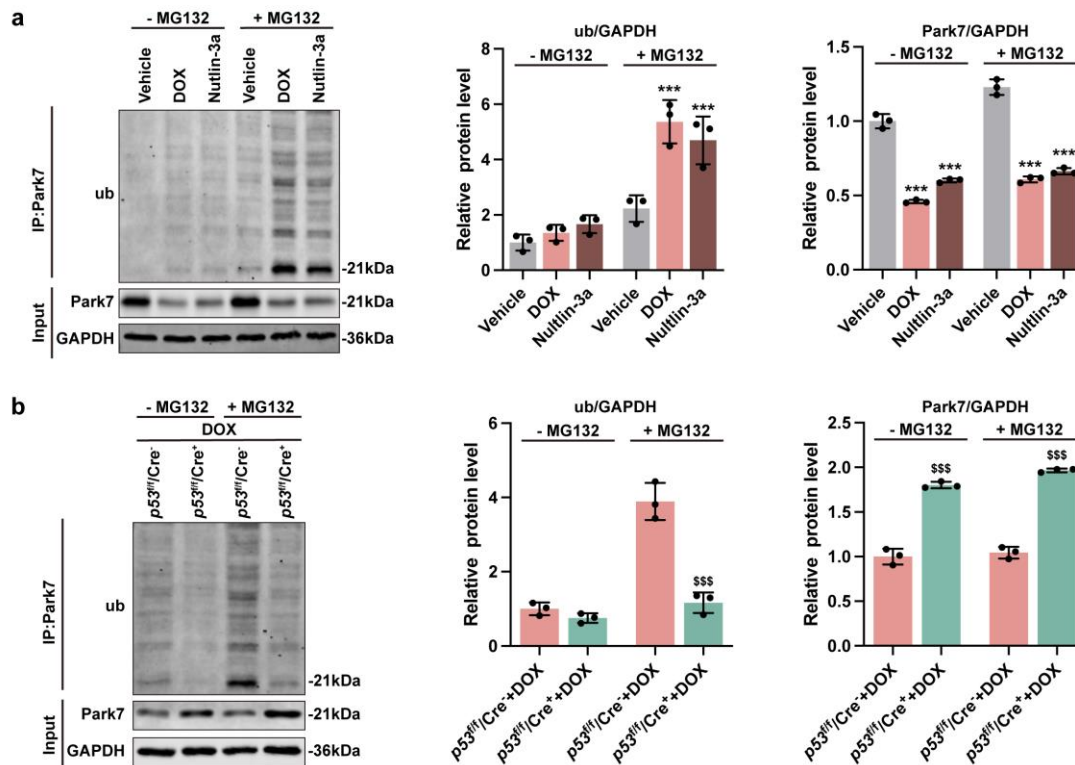

**Figure S4 p53 downregulates Park7 protein levels through ubiquitination.**

**a)** MNCMs were treated by DOX or Nutlin-3a with or without MG132 and Park7 was

isolated by IP. Representative immunoblots and quantitative analysis of Park7 ubiquitination were assessed with anti-ub antibody (n = 3). **b)** MNCMs isolated from  $p53^{f/f}/Cre^{-}$  and  $p53^{f/f}/Cre^{+}$  mice were treated by DOX with or without MG132 and Park7 was isolated by IP. Representative immunoblots and quantitative analysis of Park7 ubiquitination were assessed with anti-ub antibody (n = 3). The data are expressed as mean  $\pm$  SD and analyzed using one-way ANOVA followed by Tukey's post hoc test, \*\*\*p < 0.001 vs. Vehicle group under the same condition; \$\$\$p < 0.001 vs.  $p53^{f/f}/Cre^{-}+DOX$  group under the same condition.

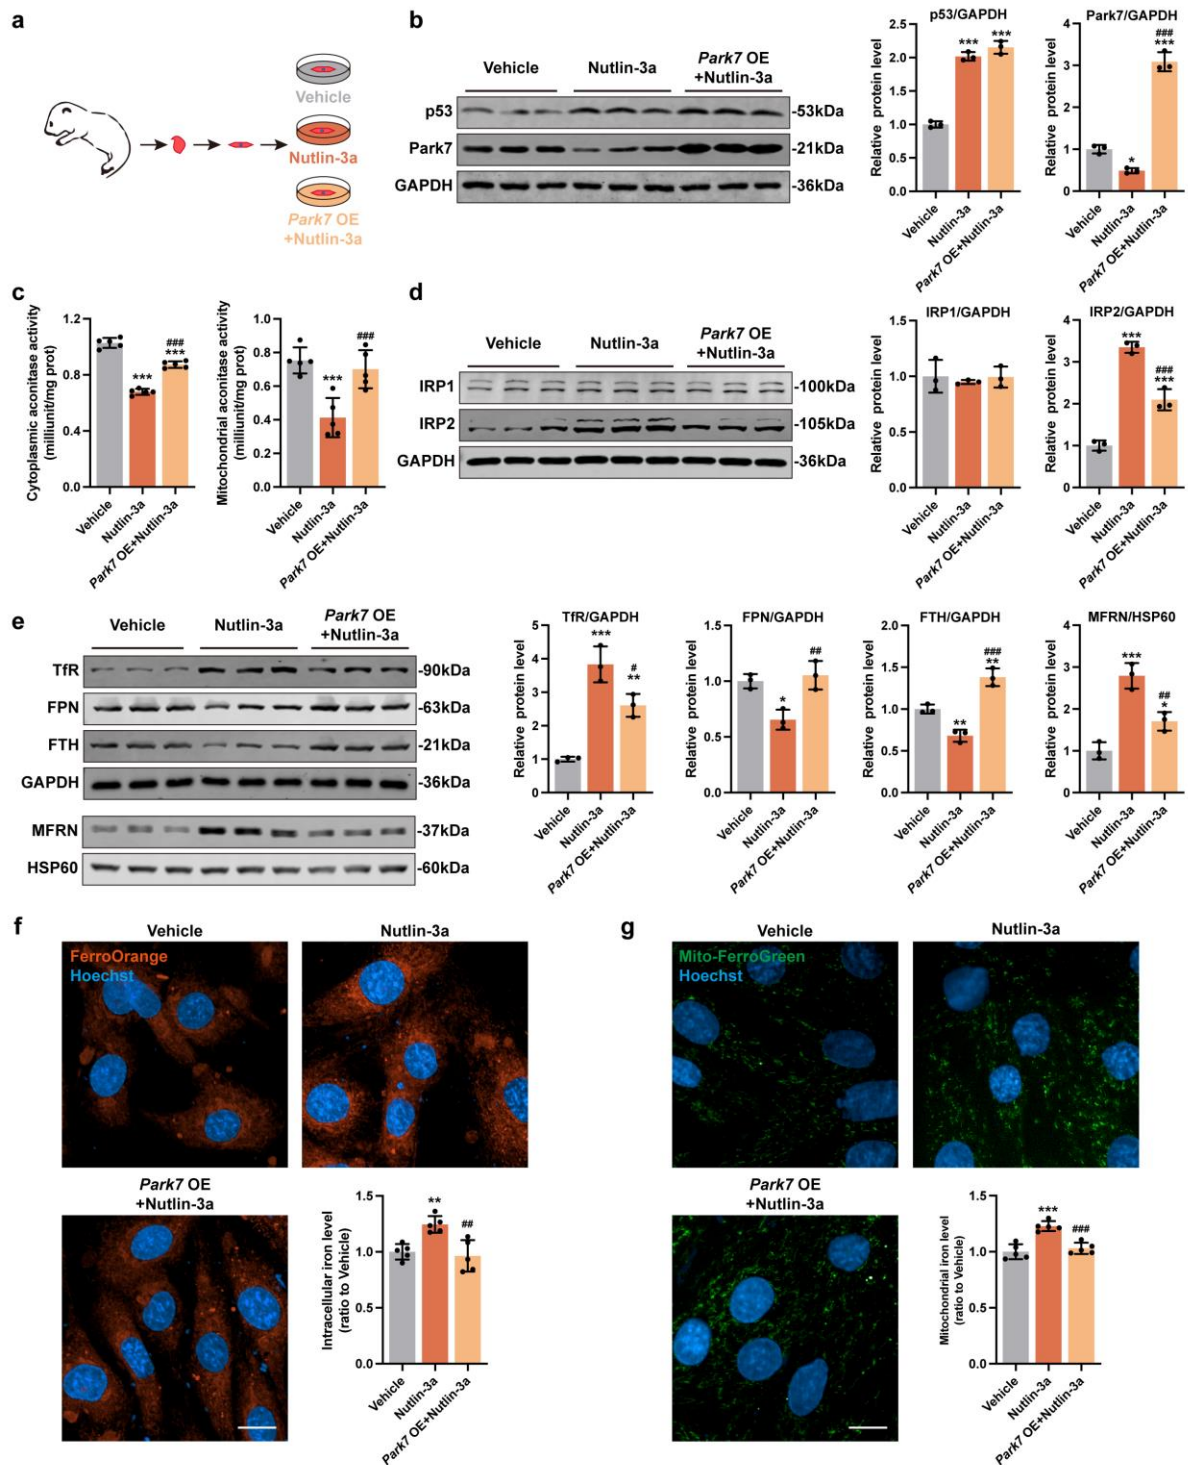

**Figure S5 p53/Park7 axis regulates iron homeostasis in healthy cardiomyocytes.**

a) Experiment design for p53 activation with or without Park7 rescue in healthy NCMs. b)

Representative immunoblots and quantitative analysis of Park7 and p53 protein level (n = 3).

**c)** The cellular aconitase activity and mitochondrial aconitase activity in NMCs (n = 5). **d)** Representative immunoblots and quantitative analysis of IRP1 and IRP2 protein level in NMCs (n = 3). **e)** Representative immunoblots and quantitative analysis of iron homeostasis-related proteins in NMCs (n = 3). **f)** Representative micrographs and quantification of intracellular iron level (FerroOrange staining) in NMCs (scale bars, 20 $\mu$ m; n = 5). **g)** Representative micrographs and quantification of mitochondrial iron level (Mito-FerroGreen staining) in NMCs (scale bars, 20 $\mu$ m; n = 5). The data are expressed as mean  $\pm$  SD and analyzed using one-way ANOVA followed by Tukey's post hoc test, \*p < 0.05, \*\*p < 0.01 and \*\*\*p < 0.001 vs. Vehicle group; ##p < 0.01 and ###p < 0.001 vs. Nutlin-3a group.

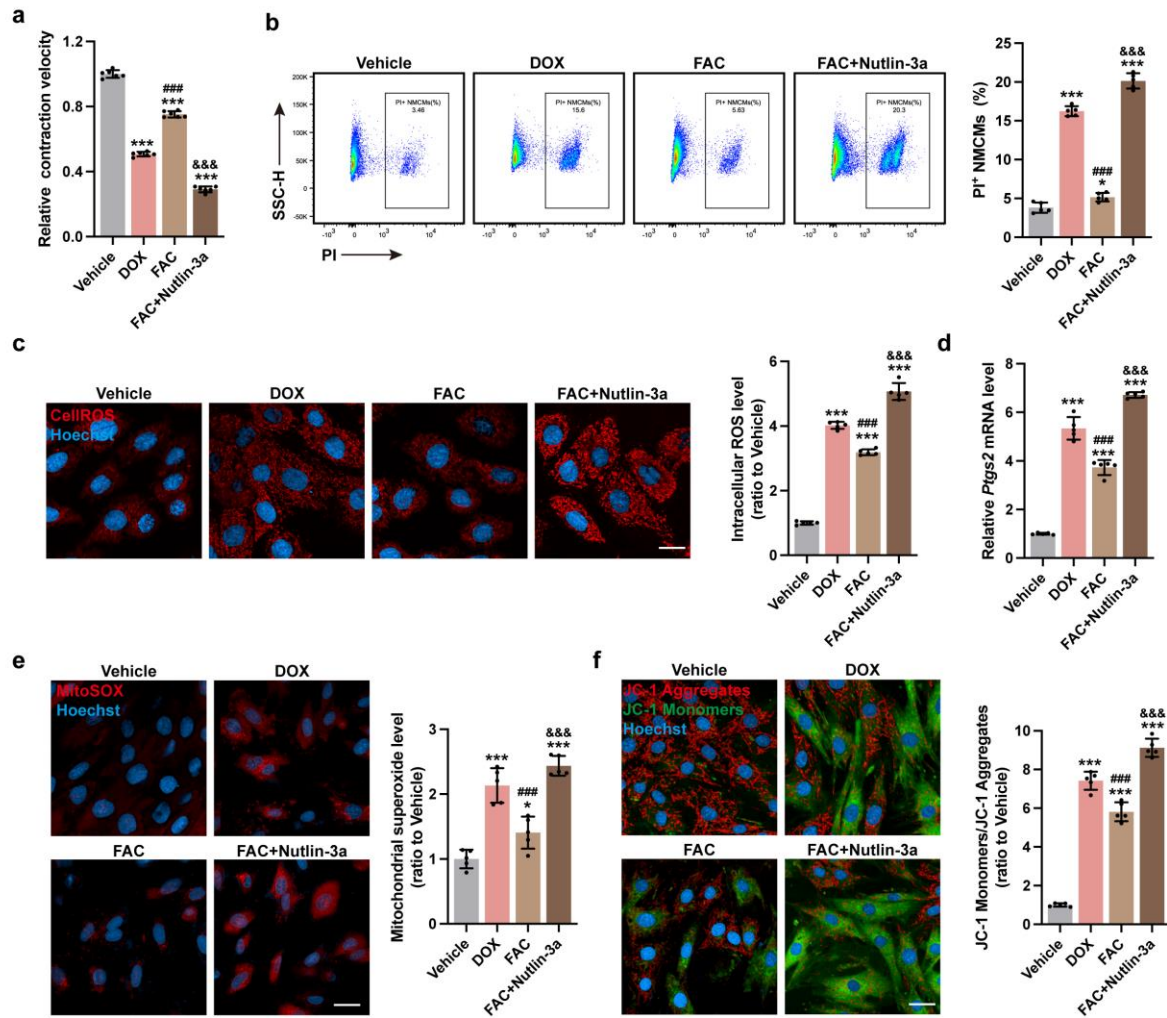

**Figure S6 p53 activation recapitulates ferroptosis phenotype in FAC-treated NCMs.**

**a)** Contractile velocity of NCMs extrapolated from live cell imaging (n = 6). **b)** The percentage of PI<sup>+</sup> NCMs were calculated using flow cytometry (n = 5). **c)** Representative micrographs and quantification of intracellular ROS (CellROS staining) in NCMs (scale bars, 20µm; n = 5). **d)** *Ptg2* mRNA expression level in NCMs (n = 5). **e)** Representative micrographs and quantification of mitochondrial superoxide level (MitoSOX staining) in NCMs (scale bars, 20µm; n = 5). **f)** Representative micrographs and quantification of mitochondrial membrane potential (JC-1 staining) in NCMs (scale bars, 20µm; n = 5). The

data are expressed as mean  $\pm$  SD and analyzed using one-way ANOVA followed by Tukey's post hoc test, \* $p < 0.05$  and \*\*\* $p < 0.001$  vs. Vehicle group; ### $p < 0.001$  vs. DOX group; &&& $p < 0.001$  vs. FAC group.

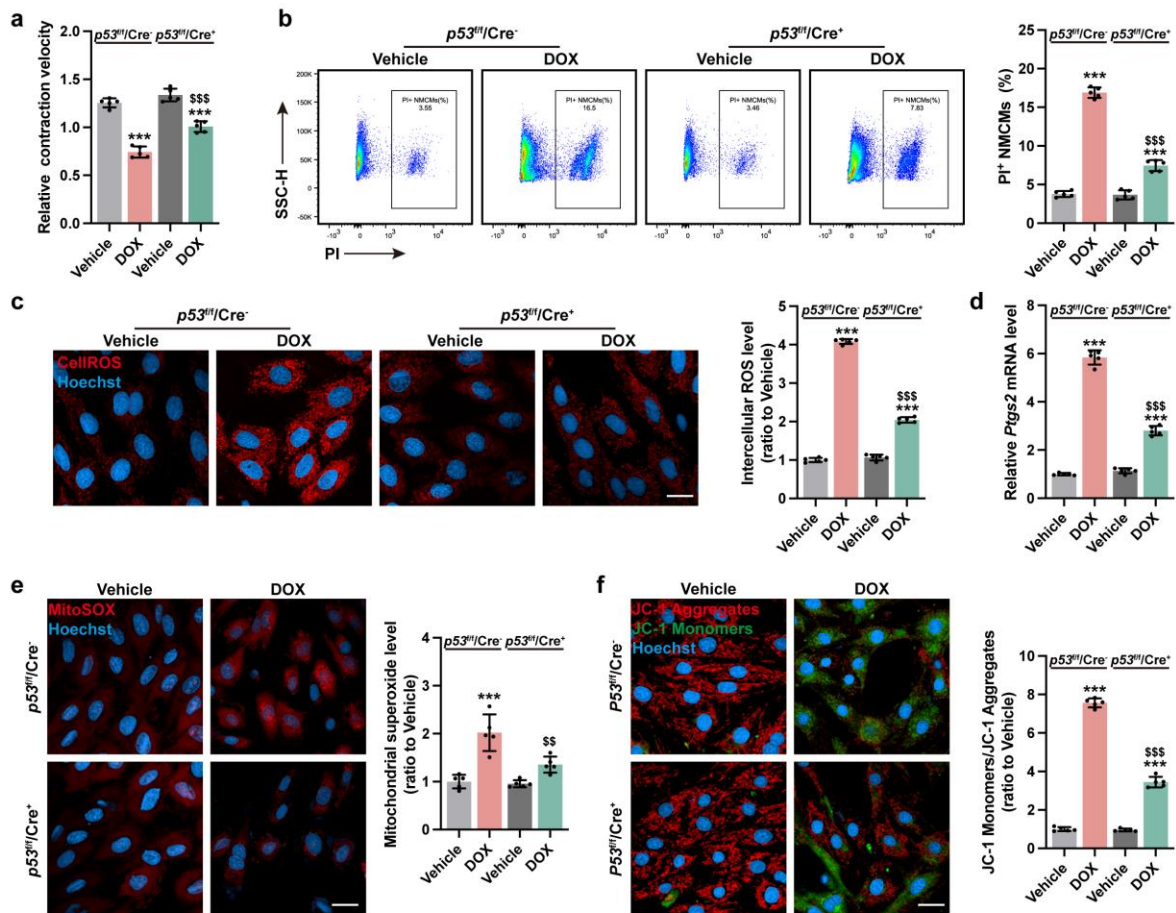

**Figure S7 Knockout of *p53* ameliorated DOX-induced iron metabolism dysfunction and ferroptosis in NMCs.**

**a)** Contractile velocity of NMCs extrapolated from live cell imaging (n = 6). **b)** The percentage of PI<sup>+</sup> NMCs were calculated using flow cytometry (n = 5). **c)** Representative micrographs and quantification of intracellular ROS (CellROS staining) in NMCs (scale bars, 20 $\mu$ m; n = 5). **d)** *Ptgs2* mRNA expression level in NMCs (n = 5). **e)** Representative

micrographs and quantification of mitochondrial superoxide level (MitoSOX staining) in NMCMs (scale bars, 20 $\mu$ m; n = 5). **f)** Representative micrographs and quantification of mitochondrial membrane potential (JC-1 staining) in NMCMs (scale bars, 20 $\mu$ m; n = 5). The data are expressed as mean  $\pm$  SD and analyzed using one-way ANOVA followed by Tukey's post hoc test, \*\*\*p < 0.001 vs. Vehicle group; \$\$p < 0.01 and \$\$\$p < 0.001 vs. *p53*<sup>f/f</sup>/Cre<sup>-</sup>+DOX group.



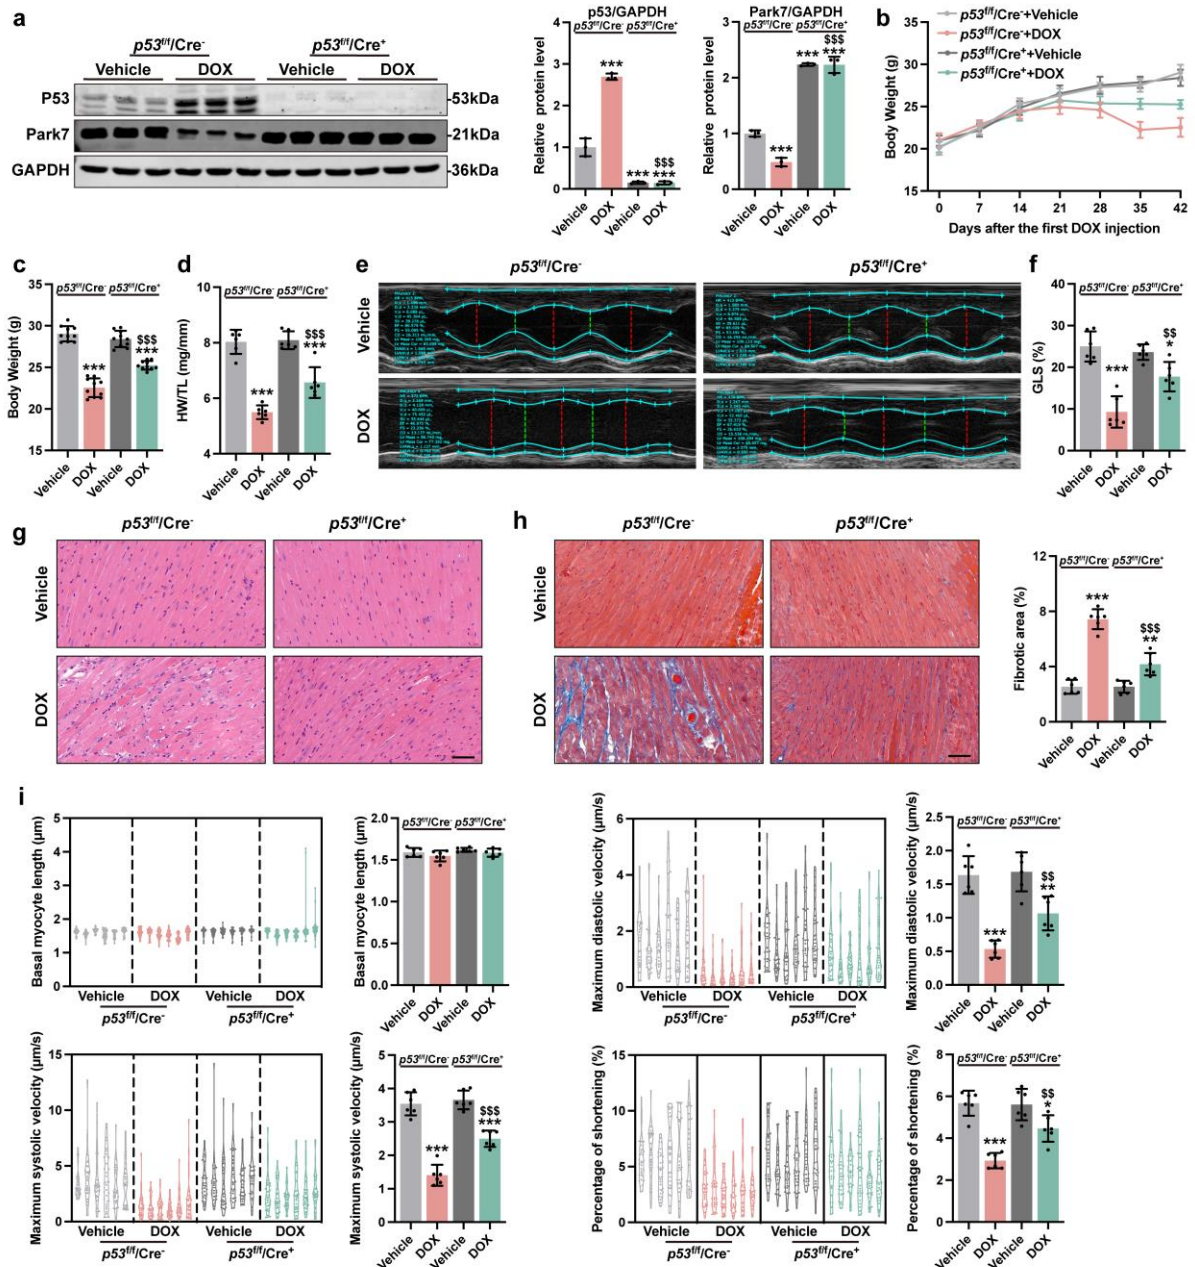

**Figure S8 Knockout of *p53* ameliorates DoIC in mice.**

**a)** Representative immunoblots and quantitative analysis of Park7 and p53 protein level in AMCMs (n = 3). **b)** Body weight tracing during DoIC model (n = 10). **c)** Body weight of mice before sacrificed (n = 10). **d)** Ratio of heart weight to tibia length (HW/TL; n = 6). **e)** Representative M-mode images of transthoracic echocardiography. **f)** Quantification of

global longitudinal strain (GLS; n = 6). **g)** Representative micrographs of H&E staining in heart sections (scale bars, 50  $\mu\text{m}$ ). **h)** Representative micrographs of Masson's trichrome staining and percentage of fibrotic area in heart sections (scale bars, 50  $\mu\text{m}$ ; n = 6). **i)** Calculation of basal myocyte length, maximum systolic velocity, maximum diastolic velocity and percentage of shortening of AMCMs (n = 30 AMCMs per mice, 6mice per group). The data are expressed as mean  $\pm$  SD and analyzed using one-way ANOVA followed by Tukey's post hoc test, \*p < 0.05, \*\*p < 0.01 and \*\*\*p < 0.001 vs. Vehicle group; \$\$p < 0.01 and \$\$\$p < 0.001 vs. *p53<sup>f/f</sup>/Cre<sup>-</sup>*+DOX group.

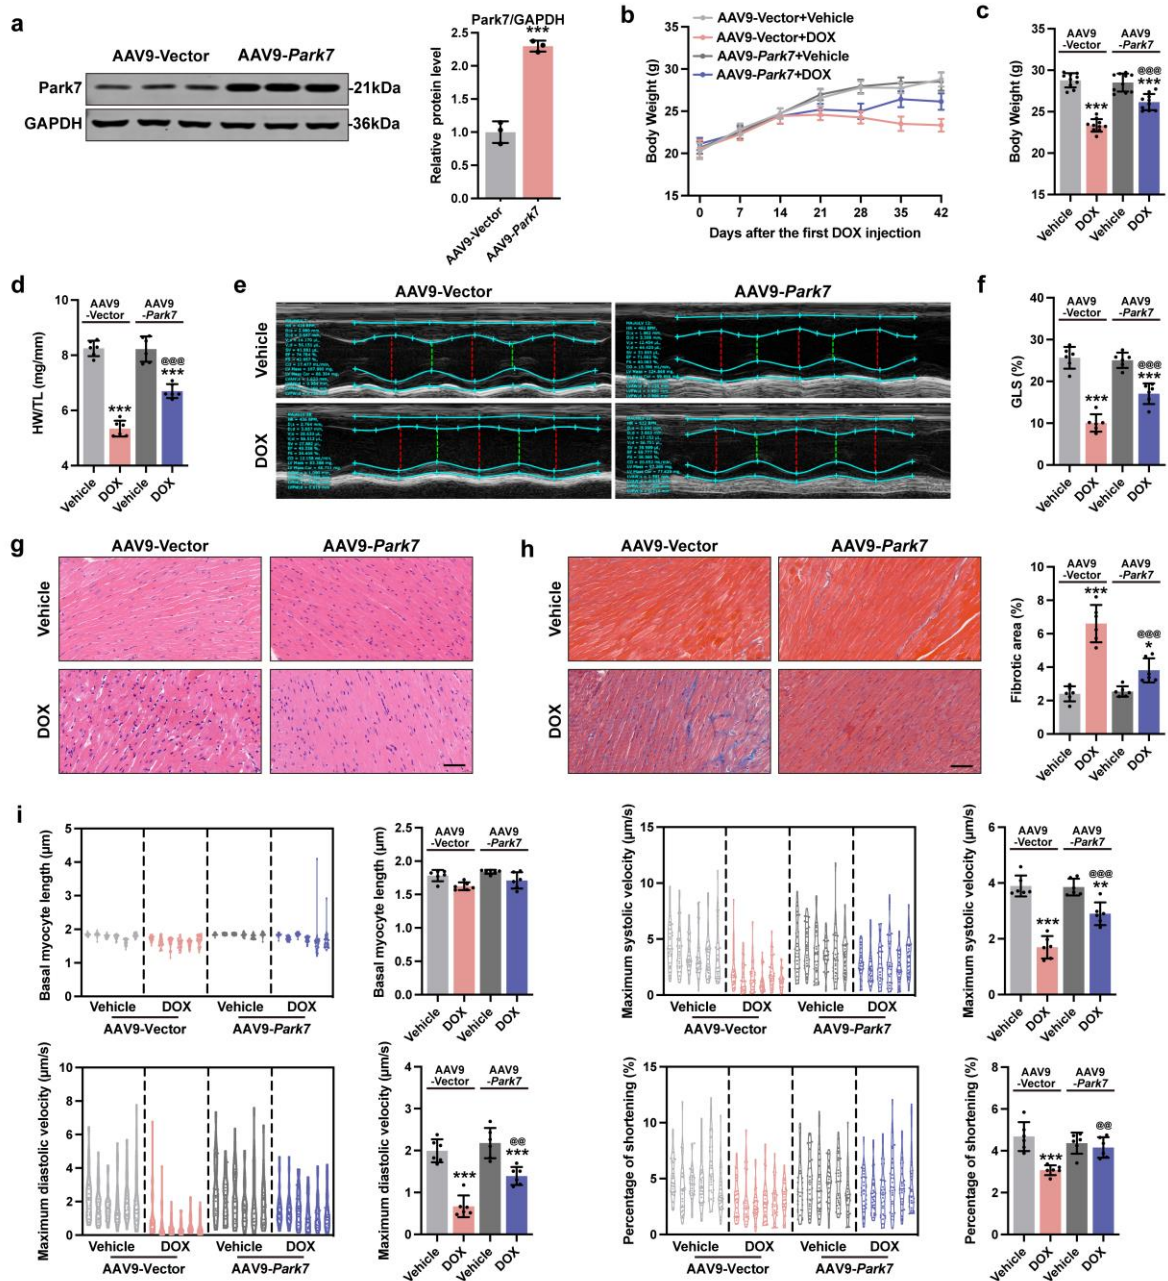

**Figure S9 Overexpression of *Park7* ameliorates DoIC in mice.**

**a**) Representative immunoblots and quantitative analysis of Park7 protein level in AMCMs (n = 3). **b**) Body weight tracing during DoIC model (n = 10). **c**) Body weight of mice before sacrificed (n = 10). **d**) Ratio of heart weight to tibia length (HW/TL; n = 6). **e**) Representative M-mode images of transthoracic echocardiography. **f**) Quantification of global longitudinal strain (GLS; n = 6). **g**) Representative micrographs of H&E staining in heart sections (scale

bars, 50  $\mu\text{m}$ ). **h)** Representative micrographs of Masson's trichrome staining and percentage of fibrotic area in heart sections (scale bars, 50  $\mu\text{m}$ ; n = 6). **i)** Calculation of basal myocyte length, maximum systolic velocity, maximum diastolic velocity and percentage of shortening of AMCMs (n = 30 AMCMs per mice, 6mice per group). The data are expressed as mean  $\pm$  SD and analyzed using one-way ANOVA followed by Tukey's post hoc test, \*p < 0.05, \*\*p < 0.01 and \*\*\*p < 0.001 vs. Vehicle group; @@p < 0.01 and @@@p < 0.001 vs. AAV9-Vector+DOX group.

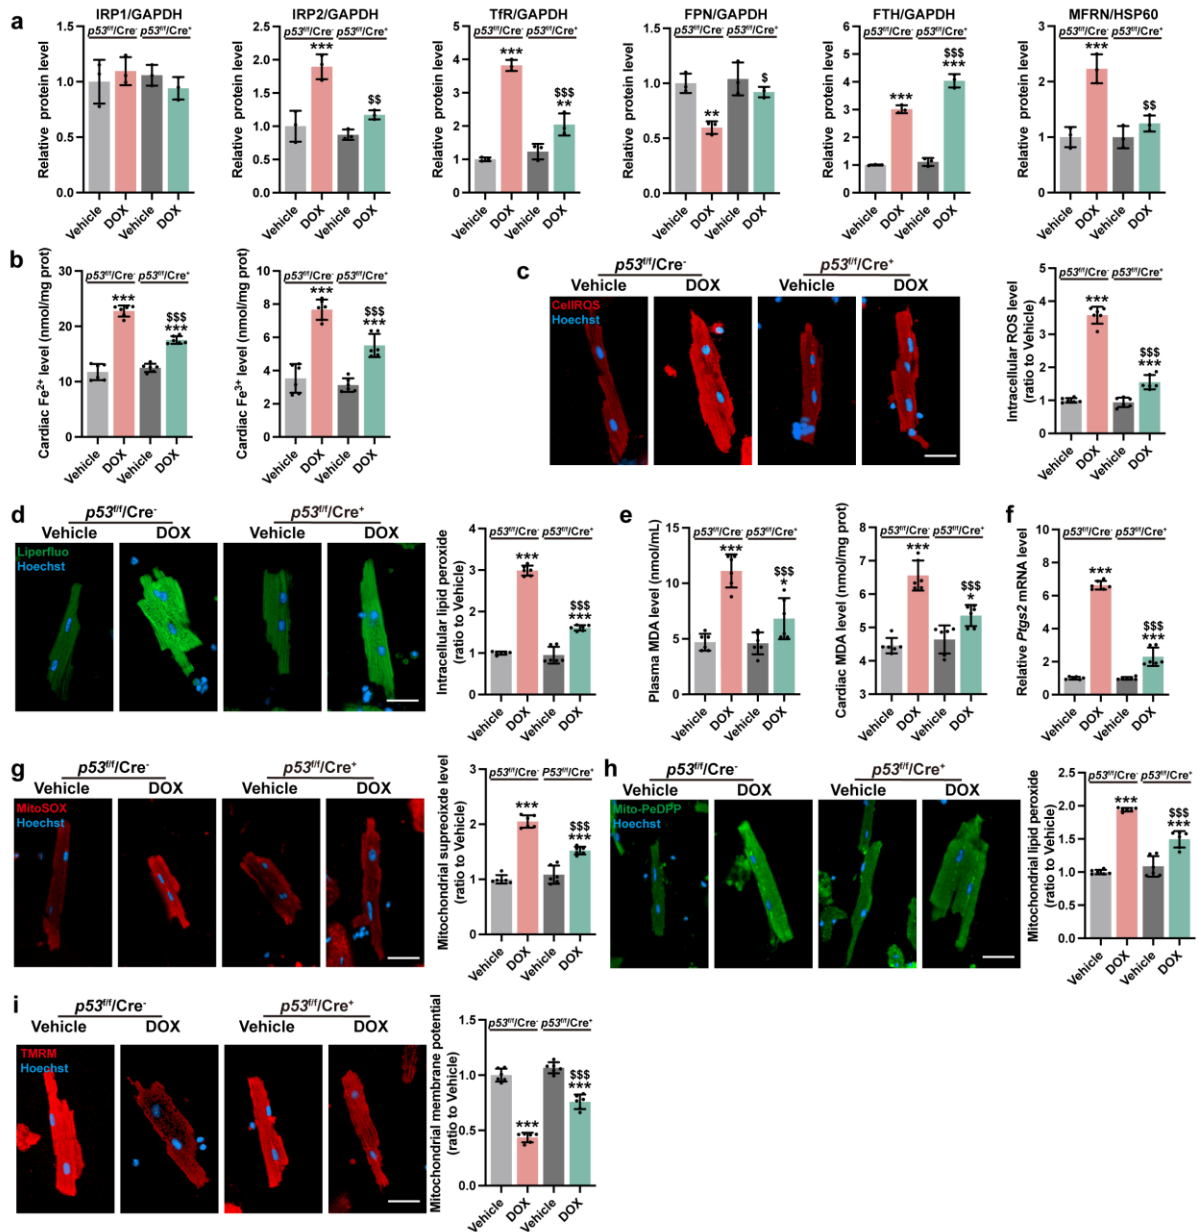

**Figure S10 Knockout of *p53* alleviates DOX induced myocardial iron homeostasis dysfunction and ferroptosis in mice.**

**a)** Quantitative analysis of cellular and mitochondrial iron homeostasis-related proteins in AMCMs in Figure 8e (n = 3). **b)**  $Fe^{2+}$  and  $Fe^{3+}$  levels in heart tissues (n = 6). **c)** Representative micrographs and quantification of intracellular ROS (CellROStaining) in AMCMs (scale bars, 20 $\mu$ m; n = 6). **d)** Representative micrographs and quantification of

intracellular lipid peroxide (Liperfluo staining) in AMCMs (scale bars, 20 $\mu$ m; n = 6). **e)** MDA level in plasma and heart tissues (n = 6). **f)** *Ptgs2* mRNA expression level in AMCMs (n = 6). **g)** Representative micrographs and quantification of mitochondrial superoxide level (MitoSOX staining) in AMCMs (scale bars, 20 $\mu$ m; n = 6). **h)** Representative micrographs and quantification of mitochondrial lipid peroxide (Mito-PeDPP staining) in AMCMs (scale bars, 20 $\mu$ m; n = 6). **i)** Representative micrographs and quantification of mitochondrial membrane potential (TMRM staining) in AMCMs (scale bars, 20 $\mu$ m; n = 6). The data are expressed as mean  $\pm$  SD and analyzed using one-way ANOVA followed by Tukey's post hoc test, \* $p < 0.05$ , \*\* $p < 0.01$  and \*\*\* $p < 0.001$  vs. Vehicle group; \$ $p < 0.05$ , \$\$ $p < 0.01$  and \$\$\$ $p < 0.001$  vs. *p53*<sup>fl/fl</sup>/Cre<sup>-</sup>+DOX group.

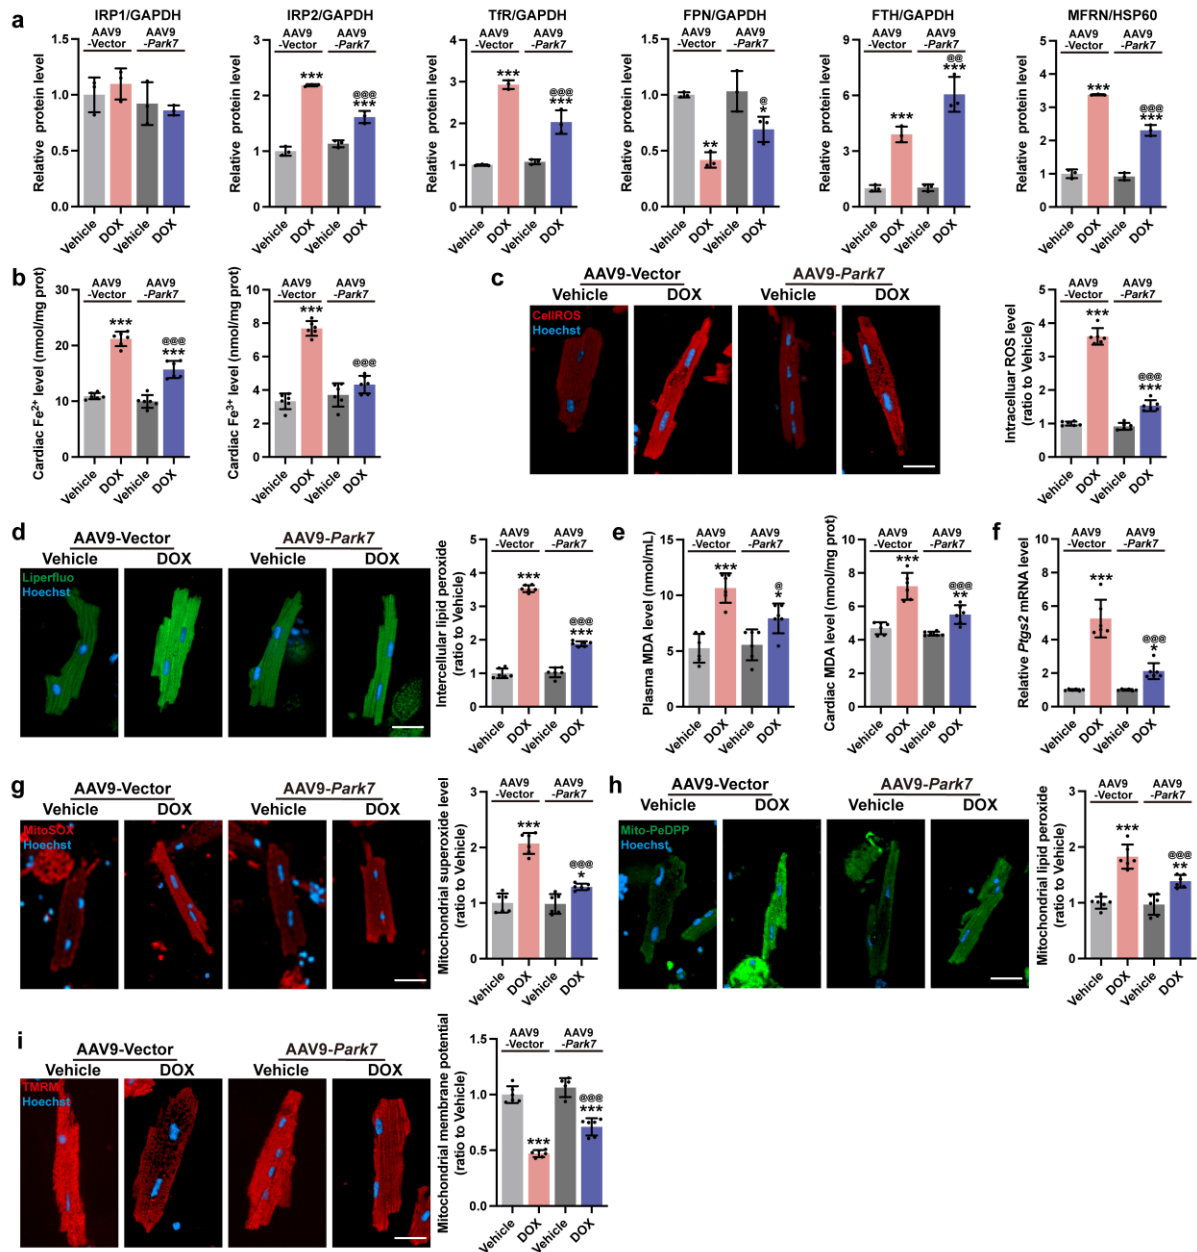

**Figure S11 Overexpression of *Park7* alleviates DOX induced myocardial iron homeostasis dysfunction and ferroptosis in mice.**

**a)** Quantitative analysis of cellular and mitochondrial iron homeostasis-related proteins in AMCMs in Figure 8E (n = 3). **b)**  $Fe^{2+}$  and  $Fe^{3+}$  levels in heart tissues (n = 6). **c)** Representative micrographs and quantification of intracellular ROS (CellROS staining) in AMCMs (scale bars, 20 $\mu$ m; n = 6). **d)** Representative micrographs and quantification of

intracellular lipid peroxide (Liperfluo staining) in AMCMs (scale bars, 20 $\mu$ m; n = 6). **e)** MDA level in plasma and heart tissues (n = 6). **f)** *Ptgs2* mRNA expression level in AMCMs (n = 6). **g)** Representative micrographs and quantification of mitochondrial superoxide level (MitoSOX staining) in AMCMs (scale bars, 20 $\mu$ m; n = 6). **h)** Representative micrographs and quantification of mitochondrial lipid peroxide (Mito-PeDPP staining) in AMCMs (scale bars, 20 $\mu$ m; n = 6). **i)** Representative micrographs and quantification of mitochondrial membrane potential (TMRM staining) in AMCMs (scale bars, 20 $\mu$ m; n = 6). The data are expressed as mean  $\pm$  SD and analyzed using one-way ANOVA followed by Tukey's post hoc test, \* $p < 0.05$ , \*\* $p < 0.01$  and \*\*\* $p < 0.001$  vs. Vehicle group; @ $p < 0.05$ , @@ $p < 0.01$  and @@@ $p < 0.001$  vs. AAV9-Vector+DOX group.
